# Supplementary material for: Distance of flight of cosmic-ray muons to study dynamics of the upper muosphere
Source: Copernicus journal article supplement (doi:10.5194/gi-2024-4), 2024-08-20
Supplement: Supplementary file [file gi-2024-4-AC1-supplement.pdf]

RC1

(1) The paper presents the concept of muosphere as the region where a high concentration of muons and its limit respectively. It describes muosphere/muopause dynamics depending on crustal density (millennia time order) or isobaric surface height variations. The author introduces the DoF (Distance of Flight) technique for characterizing the muosphere based on measured data of the muon flux. The paper describes in detail the modeling process and compares it with measured data. The technique is interesting but its application in a concrete problem isn't obvious. It's important to extend this technique in a real scenario and contrast it conceptually with techniques (like LIDAR) that can perform the same work.

[AUTHOR]:

UV and visible light used for LiDAR are scattered/reflected by cloud and thus, ground-based LiDAR cannot be used for measuring the tropopause height when thick cloud covers the sky while the satellite-based LiDAR is not influenced by such lower cloud. However, researchers seem to utilize LiDAR to detect the reflection of the cloud located near the tropopause to indirectly acquire its height. If there is no cloud, satellite-based LiDAR technique cannot be applied.

[https://www.researchgate.net/publication/238780374\\_Study\\_of\\_Tropopause\\_Height\\_over\\_Buenos\\_Aires\\_Monitored\\_with\\_lidar\\_system](https://www.researchgate.net/publication/238780374_Study_of_Tropopause_Height_over_Buenos_Aires_Monitored_with_lidar_system)

Muons are generated most extensively at the location where the density gradient accidentally matches with the density gradient near the tropopause. If the tropopause shifts upward, this density gradient shifts upward accordingly, and accordingly, the muopause shifts upward, then the muon's travel distance increases. The current technique measures the height of where muons are extensively generated; hence the height of the tropopause by measuring the muon's distance of flight (DOF). Due to the muon's strong penetrating capability, the DOF technique is not influenced by the cloud existence.

# Editorial comments will be applied to the draft in the next step. It seems this journal's system requires sending the response first and then subsequently revising the draft.

=====

RC2

(1) The entire point of this paper is to extract knowledge about the atmospheric dynamics from measurements (performed at sea level) of observables that implicitly integrate through a very thick amount of atmosphere (from 30 to 0 km a.s.l.). Necessarily, this implies that in order to extract any

interpretation from this method we need a reliable simulation of the atmospheric dynamic. This creates a sort of circular logic. Not being an atmospheric scientist, I would like to see the paper elaborate more explicitly on this point: how much can we rely on the models and which free parameters of the models can be pinned down with this new method?

[AUTHOR]:

The entire point of this paper is NOT from measurements of observables that implicitly integrate through a very thick amount of atmosphere.

The entire point of this paper is to measure the geometrical distance the location where the muons are generated (muopause) and the location where the muons are detected.

The "geometrical distance" is much clearer physical quantity than "areal density integrated over a very thick amount of atmosphere" that includes various unknown parameters.

For most of the cosmic muons ( $< 50\text{GeV}$ ) the muon flux observed at sea level is compilation of (A) the barometric effect and (B) the muopause height variation effect. Factor (A) has been well studied in the prior work:

<https://www.nature.com/articles/s41598-022-20039-4>

The current study clarified that factor (B) is larger than factor (A), and factor (B) can be well estimated by applying JMA barometric correction.

(2) I am not sure how to reconcile the assumptions of this paper with the similar study by Tramontini et al.:

<https://agupubs.onlinelibrary.wiley.com/doi/10.1029/2019EA000655>

In that paper, the muon flux is used to infer information about the middle-atmosphere dynamics such as SSW. I also note that SSW are mentioned at lines 75-76 of the present paper (but without citing Tramontini et al.).

My understanding is that the two studies are using the same probe to analyze the same medium, but under different assumptions and to infer different free parameters. If that's the case, what could be done to disentangle the middle- and upper- atmosphere dynamics in order to get less model-dependent results?

I suggest to include a citation to that paper (to which I am not related, therefore I might have misunderstood its message), accompanied by a critical discussion of similarity, difference and possible complementarity with the present study.

[AUTHOR]:

Thanks for letting me know this interesting work done in 2019 which I embarrassingly didn't know. I will include this reference to this work.

As is written in this paper:

"An increase in the atmospheric temperature lowers the atmospheric density. Temperature changes in the atmosphere may therefore affect the production of muons (Gaisser et al., 2016), " These authors applied the muon's barometric effect to their atmospheric study.

And what they measured was "observables that implicitly integrate through a very thick amount of atmosphere."

There are three phenomena that affects the muon flux (A) variations in hadronic interaction MFPs due to stratospheric temperature variations, (B) variations in the muopause height due to variations in depth of tropospheric convection; hence variations in the muon's distance of flight between the muopause and sea level, and (C) variations in the muon's range due to barometric variations. There are three effects in total. Among these, factor (A) is prominent only for high energy muons (> 50 GeV). Tramontini et al. applied factor (C) to their work to study atmospheric density variations. On the contrary, factor (B) was applied to this work. This will be clarified in the draft.

(3) Similarly, I understand that this work makes also different assumptions with respect to the papers cited at lines 95-98. It is said at lines 99-100 that the difference is that those works focused on barometric and temperature effects. I suppose that the same can be said of the SSW study by Tramontini et al.? Anyway, a few more words would be appreciated here, to also address the previous point.

[AUTHOR]:

The aforementioned issues will be more clarified in the draft.

(4) The paper separates the barometric effect and the isobaric height effect. Usually one has the barometric formula describing the functional dependence between the pressure and the height, in that case, the ground-level pressure should correlate with the height of the muon generation layer. May you please clarify whether by "barometric effect" it is meant here the effect of deviation from the canonical barometric formula?

[AUTHOR]:

Yes, your understanding is correct. The ground-level pressure correlates with the muopause height. If the ground surface is heated, more convection grows, the pressure decreases, and the muopause

height increases. The muon flux we observe at sea level is a compilation of the factors (B) and (c).

However, factor (B) can be separated from factor (C) because these factors influence to physically independent processes (energy loss process & decay process); hence these processes can be independently quantified, and can be merged at the end. This will be clarified in the draft.

(5) Lines 151-152: not only the energy loss, but also the probability of meson-nucleus interactions. Can you argue that this has a negligible effect on your conclusions?

[AUTHOR]:

The influence of variations in hadronic interaction MFP to the muon flux is only limited to the muon's energy range only above 50 GeV [1] (for pions to travel a sufficient distance to collide with another nuclei), and it is not the energy range we discuss here.

[1] The IceCube Collaboration. Seasonal variation of atmospheric muons in IceCube (2019). Retrieved from <https://par.nsf.gov/servlets/purl/10171530>

The fraction of the muons above 50 GeV to the entire cosmic muons is less than 0.5% and thus, this hadronic effect is negligible.

(6) One of the crucial and most original developments in this paper is the proposal to use cyclone data for calibration. I find it clever, but again this makes several implicit assumptions: in essence, it is assumed that the barometric dependence of muon flux variations is universal. At the very least, I would like to see a proof that it is universal across different cyclones (and even that, probably, wouldn't be an air-tight proof that the calibration is valid in all contexts). Are there additional cyclone datasets that the author can analyse and compare, ...

[AUTHOR]:

One of the crucial and most original developments in this paper is NOT the proposal to use cyclone data for calibration. The author doesn't think "the use of cyclones for the calibration of the method" is so original and main contribution to this paper. This has been already established at <https://www.nature.com/articles/s41598-022-20039-4>.

The relationship between the muon flux and the pressure drop by the cyclone passage is well documented in this reference (see Figure 1, Figures 6-8.)

Figure 2 in the current work simply shows the consistency with the prior work: 1.5%/10hPa.

The crucial and most original developments in this paper is the "tropopause scanner (somewhat like

atmospheric LiDAR (ATLID))" by measuring the distance of flight of cosmic muons.

By applying this technique, the tropopause height distribution can be map out for studying the atmospheric radiative balance. As far as I know, this methodology has never been appeared in the history of cosmic ray science.

(7) How stable is the detector response? Implicit in all this analysis is that any observed variation in muon flux can only be due to factors that are external to the detector. But if e.g. the gain or the noise of the detector depend on some systematic effect, which is usually the case, this should be estimated. For the type of detector considered, for example, one can expect significant dependence on the local temperature around it. The statement at line 172 may be too optimistic. If the calibration procedure is such to correct for any temperature-dependent or time-dependent effect at the detector level, additional details must be provided about that.

All this is particularly relevant to support the statement at lines 322-323: one can imagine for example that a dependence of the detector response to the local temperature might have the negative correlation observed here, hence faking the effect sought to be studied. A possible test that shouldn't take too much effort could be a separation of the dataset between day and night.

[AUTHOR]:

The detectors are the same model that have been used for

<https://www.nature.com/articles/s41598-021-98559-8>

The results shown in Figures 6-8 indicate that the detectors have stably operated for many years.

However, it is difficult to quantify the detector's stability from Figures 6-8 because barometric information is included in there.

The best way to check the long-term detector stability is to use IBE (inverse barometric effect = barometric variations are compensated by the tidal height variations = total areal density above the detector will be constant as long as the detector is located undersea), so that the local fluctuations due to barometric variations can be intrinsically removed from the data without any artificial actions (such as subtracting a modeled value).

I prepared one figure below to show how barometric variations are well canceled out by tidal height variations in Tokyo bay. Therefore, if muons are measured underneath Tokyo bay, the muon flux there is not influenced by barometric variations. According to this, residual barometric fluctuation is suppressed within a few hPa at the maximum.

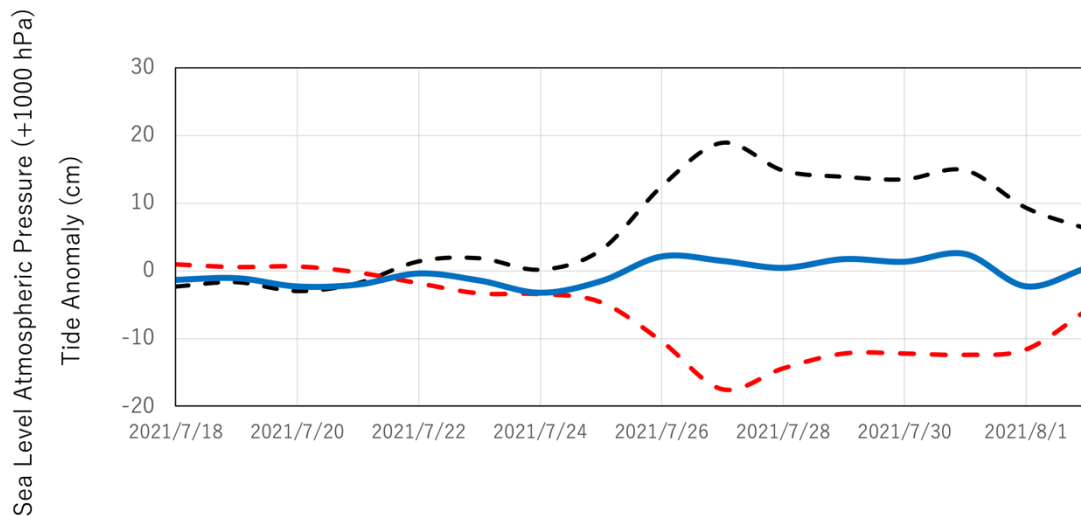

Figure. Example of the temporal variations in the tide anomaly observed at the Chiba Tide Gauge Station, Japan

As the next step, I show you the stability of the detector that consists of R7724 and EJ200 (the same configuration used in this work). The data were taken at the underwater tunnel called the Trance Tokyo-bay Aqua Line which is the busiest highway tunnel in Japan. The results are shown in Figure 4 at <https://www.nature.com/articles/s41598-021-98559-8>.

The muon rate is almost constant and the average muon counts per lunar day (to cancel out the astronomical tide) and standard deviation (S.D.) were respectively 1,144,288 and 3187 (~ 2.8 per mille including statical errors of ~1 per mille) for more than 5-month measurements. The temperature inside the tunnel varies more than 20 degrees between winter and summer because it is a tunnel that opens to the ground surface. (The tendency of decrease in muon counts comes from the thermal expansion of the pacific ocean.)

(8) Provide somewhere the goodness of fit test for the calibration curve of Fig. 2 (right).

[AUTHOR]:  
Will be provided.

(9) It is mentioned at Lines 228-230 that the muon spectrum model is taken from three experimental papers. I think that more details are necessary here. Are these three measurements compatible between them? Were they combined (and if so, how)? Or are they covering disconnected ranges in

momentum and zenith angle, such that there is no need of combining but there is a need for interpolating as explained in point B (lines 232- 233)? Figure 5 only shows the interpolated model, I suggest to overlay the input data points on this plot (which would probably make my questions unnecessary).

[AUTHOR]:

The data points will be overlaid.

(10) The apparatus comprises slabs of both lead and steel. What is the purpose of having both? I assume that one is more effective against a type of background and the other against another type, but the current text is not explaining that, and it is probably not obvious.

[AUTHOR]:

A stainless-steel case is needed to protect the lead for the following reasons.

(A) Lead is soft, and for long-time measurements, it is deformed, so it has to be supported by the stainless-steel case.

(B) Lead is poisonous. Not allowed to use it outdoor environments without coverage, so it has to be covered by the stainless-steel box.

(11) As mentioned in Section 5 the muon flux is normalized to the value observed on Aug. 20, 2017. Are Delta H and Delta N in eq.(2-2) and Delta P and Delta N in eq.1 also the difference to the corresponding values of that day? If so, do the results change if a different reference day is chosen for everything?

[AUTHOR]:

Firstly, Figure 7 shows a relative muon flux: how it is varied with respect to the flux observed on Aug. 20, 2017.

Secondly, we are discussing to derive relative height variations (Delta H) from relative differential flux variations ( $I_2/I_1$ )

For example,

On Aug. 20, 2017,

$$I_1 = I_0 \exp(-\Delta H_1 (\sin \theta)^{-1} / 660 \text{ gamma } (E)[m]) (1 - \Delta N_1)$$

$n_1$  = corresponding integrated flux

On Oct. 20, 2017

$$I_2 = I_0 \exp(-\Delta H_2 (\sin \theta)^{-1} / 660 \text{ gamma } (E)[m]) (1 - \Delta N_2)$$

$n_2$  = corresponding integrated flux

$(n_1)/(n_2) =$

$\int \exp(-\Delta H_1 (\sin \theta)^{-1} / 660 \gamma (E) [m]) (1 - \Delta N_1) /$

$\int \exp(-\Delta H_2 (\sin \theta)^{-1} / 660 \gamma (E) [m]) (1 - \Delta N_2)$

Since  $\Delta N_1 / \Delta N_2$  can be derived from Eq. (1)

$\Delta H_1 - \Delta H_2$  is given.

This technique is to derive variations of the tropopause height, doesn't derive the absolute tropopause height.

In order to derive the absolute height  $H_2$ , additional measurements are needed e.g. balloon experiment. If  $H_1$  is given from other measurements,  $H_2$  can be derived.

(12)

In Figure 7 I suggest to overlay also the predicted flux without the barometric correction, to quantitatively demonstrate that including the barometric correction indeed improves the compatibility between the model prediction and data.

Will be overlaid.

(13)

Line 347 mentions limitations from (a) statistics and (b) modeling; it would be important to quantify their relative weight.

It is then mentioned that more statistics will be taken thanks to a larger detector, but at line 349 we are told that the size will be 4.5 m<sup>2</sup>, which is only twice the detector used for this paper. This means that the purely statistical uncertainty can only decrease by a factor of  $\sqrt{2}$ . Therefore, this is not going to change the game significantly: to reduce the statistical uncertainty by an order of magnitude, the detector area should increase by two orders of magnitude (the lateral size by an order of magnitude), hence it would be better to warn the reader about that. If the purpose of the 4.5 m<sup>2</sup> detector is just to verify whether precision really scales by  $\sqrt{2}$ , which would be proof that statistics limitation dominates over modeling uncertainty, then better to state it explicitly.

[AUTHOR]:

Currently, modeling and statistics (~1% SD) are comparable. As can be seen in Figure 7, there is a systematic discrepancy (1-2%) between the modeling results and the actual flux Dec 2017-Aug 2018, Oct 2018-Jan 2019, Jul 2019-Sep 2019. The statistics can be improved by increasing the size of the



detector (as you say) by two orders of magnitude. But practically, it is difficult to increase the lateral size by an order of magnitude, due to the space limitation and the costs. So, as the first step, the detector will be increased to a double size (4.5 m<sup>2</sup>) to verify whether precision really scales by  $\sqrt{2}$ , which would be proof that statistics limitation dominates over modeling uncertainty.

This will be clarified in the draft.

(14) Line 351 mentions ongoing studies with EAS Monte Carlo. Which MC programs are being used? CORSIKA?

[AUTHOR]

This statement is incorrect since developments are not ongoing.

This phrase will be revised to

...more precise modeling developments with Monte Carlo (MC) simulations such as CORSIKA and Geant4 may improve the accuracy.

# Editorial comments will be applied to the draft in the next step. It seems this journal's system requires sending the response first and then subsequently revising the draft.

=====

RC3

(1) The paper proposes an original link between sea-level muon flux measurements and assessment on the atmosphere state's equation in a whole. It introduces a neologism "muosphere" defined as the part of the atmosphere + geosphere where muon flux is relevant, in a way which still not completely clear after the reading of the article, especially on the lower border (the geosphere one) since muons penetrate the Earth over distances depending on their incident energy. The article focuses on the "muopause" but I do not see much considerations on the underground probing of the geosphere. Please develop more on both borders of your "muosphere".

[AUTHOR]

The paper's main focus is not underground probing of the geosphere. Discussing about the lower border in the geosphere is irrelevant from the DoF technique which is the focus of this paper.

However, I agree it is better to complete the description by adding the the lower border in the geosphere.

(2) The main weakness of this article is that, apart from the invention of the term "muosphere", it does not propose innovative approaches on the use of muons fluxes to derive properties of the atmosphere. It has been published in the past that muons flux is correlated to barometric observables, stratospheric temperatures etc and be used to detect transient phenomena or abrupt changes in those parameters (e.g. SSW as mentioned but not cited in the article) or to anticipate violent phenomena such as storms.

[AUTHOR]

See the replies to (1) of RC1 and (1) and (2) of RC2.

The atmospheric dynamic processes in the upper troposphere (UT) and the lower stratosphere (LS) have much interest due to their important role and impact on the atmospheric radiative balance. Factor (A) and factor (C) do not provide information to this issue, and only factor (B) has a potential to address this issue. This is the main topic of this paper.

(3) TOF methods are also well documented and I would not focus the title of the article on this item.

[AUTHOR]

Firstly, the author doesn't know where TOF methods are well documented. If you could provide some examples, that will be highly appreciated.

Secondly, the currently discussing topic is not based on the "muon's time of flight (TOF)". We don't measure the time muons travel from the point at which the muons are generated to the ground surface. What we measure is variations in survival rate of muons to calculate variations in muon decay rate; hence variations in the distance they traveled.

As a response to upper atmospheric dynamics, if the muopause height ascends and descends, the averaged travel lengths of muons are respectively extended and contracted. Muons tend to decay more if the muopause height ascends, and muons tend to decay less if the muopause height descends, consequently, the sea level muon flux decreases and increases as a response to the ascent and descent of the muopause. This effect has been known since many decades ago, however, as far as I know there has been no attempt to inversely use this effect to measure the distance between the muopause and the ground surface.

(4) The real originality of the paper is the use of cyclones for the calibration of the method. I would

suggest to focus more on that point and try to implement a concept close to the one of "standard candles" used in cosmology with the supernovae for instance. Please try to elaborate on this item and provide more details on the analysis tools, goodness-of-fit, likelihood analysis to assess whether the results of this method may be reproducible.

[AUTHOR]

See the reply to (6) of RC2.

CC

See the replies to (1) of RC1 and (1) and (2) of RC2.

(1) Despite the meticulous writing, there are some numerical errors:

[AUTHOR]

Will be corrected.

(2) I would ask the author to be more specific in explaining how the values between lines 172 and 179 were calculated.

[AUTHOR]

60%, 82%, and 100% for deviations of  $\leq 1s$ ,  $\leq 1.5s$ , and  $\leq 2s$  can be derived just by counting the number of data points. I imagine SD is self-explanatory.
